# Supplementary material
Source: HighWire-hosted journal article supplement (https://jnm.snmjournals.org/highwire/filestream/103978/field_highwire_adjunct_files/0/255661_Supplemental_Data.pdf)
Supplement: 255661_Supplemental_Data.pdf [file 255661_Supplemental_Data.pdf]

**Supplemental FIGURE 1.** Best PSA Response following focal therapy (EBRT) to  $^{18}\text{F}$ -rhPSMA-7 PET.

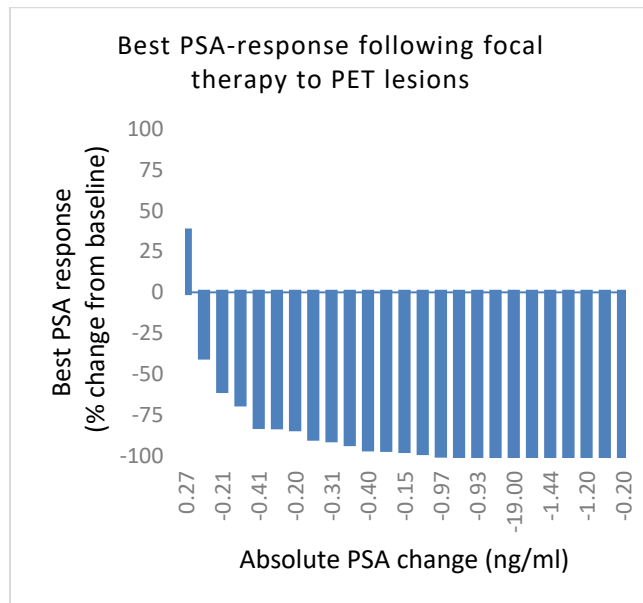

**Supplemental FIGURE 2.** True positive intraspinal metastasis

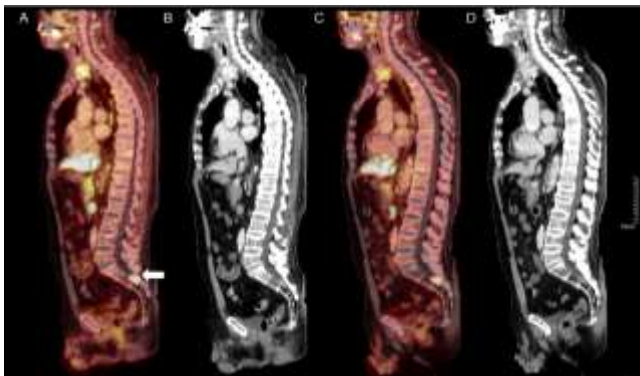

Sagittal fused PET/CT (A), and CT (B) revealed focal  $^{18}\text{F}$ -rhPSMA-7 uptake at a soft tissue lesion located at intraspinal sacrum level (arrow), representing intraspinal metastasis measured about 2.9 cm in long axis diameter. He received external beam radiation at this region up to a total dose of 37.5 Gy, VMAT technique supplemented by androgen-deprivation therapy, from August to September 2018. PSA was decreased from 1.44 ng/ml to 0.6 ng/ml after treatment. The follow up sagittal fused PET/CT (C), and CT (D) showed no significant change in size of aforementioned lesion, measured about 2.8 cm. This case was recorded as true positive according to significant PSA decreased (-58%) after targeted therapy.

**Supplemental TABLE 1.** Baseline characteristics of patients with PSA response following focal therapy (N = 25)

| <b>Characteristic</b>                                           | <b>No. (%)</b> |
|-----------------------------------------------------------------|----------------|
| <b>Age, median (range), years</b>                               | 71 (59-82)     |
| <b>Other prior therapy</b>                                      |                |
| Local salvage therapy                                           | 1 (4)          |
| ADT                                                             | 1(4)           |
| Multiple                                                        | 2 (8)          |
| Other                                                           | 1 (4)          |
| Not available / no prior treatment                              | 20 (80)        |
| <b>Time between surgery and PSMA PET, median (range), years</b> | 2.3 (0-15)     |
| <2.25                                                           | 12 (48)        |
| ≥2.25                                                           | 13 (52)        |
| <b>Primary T stage</b>                                          |                |
| <T3                                                             | 10 (40)        |
| ≥T3                                                             | 14 (56)        |
| Not available                                                   | 1 (4)          |
| <b>Pathologic regional LN staging (pN)</b>                      |                |
| pN0                                                             | 14 (56)        |
| pN1                                                             | 6 (24)         |
| pNx                                                             | 5 (20)         |
| <b>Gleason Score</b>                                            |                |
| <8                                                              | 17 (68)        |
| ≥8                                                              | 3 (12)         |
| Not available                                                   | 5 (20)         |
| <b>PSA, median (range), months</b>                              | 5.98 (4-12)    |
| <b>dtPSA*, median (range), months</b>                           | 7.89 (2-33)    |
| <6.8                                                            | 3 (12)         |
| ≥6.8                                                            | 4 (16)         |
| Not available                                                   | 18 (72)        |
| <b>PSA nadir after prostatectomy**, median (range), ng/ml</b>   | 0.03 (0-19)    |
| <0.1                                                            | 6 (24)         |
| ≥0.1                                                            | 4 (16)         |
| Not available                                                   | 15 (60)        |

**Supplemental TABLE 2.** Lesions validated as false positive by follow-up imaging per-region

| Location                                 | Per-region<br>(N=11) | %  | Criteria of false positive†                                                                                                                                                                                                                                                                                                                                                                             |
|------------------------------------------|----------------------|----|---------------------------------------------------------------------------------------------------------------------------------------------------------------------------------------------------------------------------------------------------------------------------------------------------------------------------------------------------------------------------------------------------------|
| Prostate bed                             | 2                    | 18 | In 3-12 months follow up; all PSMA-positive lesion which do not meet the following criteria; a) size decrease >30% with systemic / focal therapy, b) size increase >20% with/without systemic / focal therapy, and c) minimum size change of 3 mm is required.<br>- Short axis diameter was used for lymph node lesion<br>- Long axis diameter was used for lesions at prostate bed and visceral organs |
| Pelvic lymph node                        | 6                    | 55 |                                                                                                                                                                                                                                                                                                                                                                                                         |
| Extrapelvic lymph nodes/ Visceral organs | 2                    | 18 |                                                                                                                                                                                                                                                                                                                                                                                                         |
| Bone                                     | 1                    | 9  | Negative in additional bone scan or MRI                                                                                                                                                                                                                                                                                                                                                                 |

†According to UCLA/UCSF criteria follow up imaging / PSA response (Fendler et al. JAMA Oncol. 2019;5:856-863).

**Supplemental TABLE 3.** Lesions validated as false positive by follow-up imaging per-patient

| Location                                         | Per-patient<br>(N=10) | %  |
|--------------------------------------------------|-----------------------|----|
| Prostate bed only                                | 1                     | 10 |
| Pelvic lymph node only                           | 5                     | 50 |
| Extrapelvic lymph nodes/ Visceral<br>organs only | 2                     | 20 |
| Bone only                                        | 1                     | 10 |
| Prostate bed, and pelvic lymph<br>node           | 1                     | 10 |

**Supplemental TABLE 4.** Individual false positive lesions

| Patient number | Lesion type              | Treatment after PET      | Explanation                                    | Criteria                                                                  | Time to follow up study, days (months) |
|----------------|--------------------------|--------------------------|------------------------------------------------|---------------------------------------------------------------------------|----------------------------------------|
|                | <b>Prostate bed</b>      |                          |                                                |                                                                           |                                        |
| R233           | Soft tissue after RPE    | Systemic treatment (ADT) | Decreased size: 18%; 7 mm (38mm → 31 mm)       | size decrease <30% after systemic therapy                                 | 263 (9)                                |
| R5             | Soft tissue after RPE    | Systemic treatment (ADT) | Decreased size: 12%; 2mm (17mm → 15 mm)        | size decrease <30% after systemic therapy, and minimum size change < 3 mm | 426 (14)                               |
|                | <b>Pelvic lymph node</b> |                          |                                                |                                                                           |                                        |
| R5             | Pelvic lymph node        | Systemic treatment (ADT) | Decreased size: 41%; 1.5 mm (3.7 mm → 2.2. mm) | minimum size change < 3 mm                                                | 426 (14)                               |
| R200           | Pelvic lymph node        | No treatment             | No size change: 0%; 0 mm (3.5 mm → 3.5 mm)     | minimum size change < 3 mm                                                | 105 (4)                                |
| R550           | Pelvic lymph node        | No treatment             | Increased size: 5%; 0.2 mm (4.1 mm → 4.3 mm)   | size increase <20% without therapy, and minimum size change <3 mm         | 185 (6)                                |
| R773           | Pelvic lymph node        | No treatment             | Increased size: 4%; 0.2 mm (4.7 mm → 4.9 mm)   | size increase <20% without therapy, and minimum size change <3 mm         | 159 (5)                                |
| R789           | Pelvic lymph node        | Systemic                 | No size change:                                | minimum size                                                              | 202 (7)                                |

|       |                                                   |                          |                                              |                                                                    |         |
|-------|---------------------------------------------------|--------------------------|----------------------------------------------|--------------------------------------------------------------------|---------|
|       |                                                   | treatment (ADT)          | 0%; 0 (13 mm → 13 mm)                        | change <3 mm                                                       |         |
| R1184 | Pelvic lymph node                                 | No treatment             | Decreased size: 6%; 0.5 mm (8.0 mm → 7.5 mm) | size increase <20% without therapy, and minimum size change < 3 mm | 155 (5) |
|       | <b>Bone lesions</b>                               |                          |                                              |                                                                    |         |
| R985  | Bone                                              | Systemic treatment (ADT) | Negative in additional MRI                   | Negative in additional bone scan or MRI                            | 102 (3) |
|       | <b>Extrapelvic lymph nodes / visceral lesions</b> |                          |                                              |                                                                    |         |
| R478  | Retroperitoneal lymph node                        | No treatment             | No size change: 0%; 0 mm (18 mm → 18 mm)     | size increase <20% without therapy, and minimum size change < 3 mm | 103 (3) |
| R524  | Lung                                              | No treatment             | Increased size: 14%; 1 mm (7 mm → 8 mm)      | size increase <20% without therapy, and minimum size change < 3 mm | 117 (4) |

**Supplemental TABLE 5.** Non-evaluable lesions on per-patient and per-region basis

| <b>Location</b>   | <b>Per-patient<br/>(N=7)</b> | <b>%</b> | <b>Per-region<br/>(N=8)</b> | <b>%</b> |
|-------------------|------------------------------|----------|-----------------------------|----------|
| Prostate bed      | 1                            | 14       | 2                           | 25       |
| Pelvic lymph node | 1                            | 14       | 1                           | 13       |
| Visceral organs   | 0                            | 0        | 0                           | 0        |
| Bone              | 4                            | 58       | 5                           | 62       |
| >1 regions        | 1                            | 14       | 0                           | 0        |



**Supplemental TABLE 6.** Individual non-evaluable lesions

| Patient number | Lesion type              | Treatment after PET                                         | Explanation                                                                                | Time to follow/up study, days (months) |
|----------------|--------------------------|-------------------------------------------------------------|--------------------------------------------------------------------------------------------|----------------------------------------|
|                | <b>Prostate bed</b>      |                                                             |                                                                                            |                                        |
| R464           | Soft tissue after RPE    | Systemic treatment (ADT)                                    | No reliably measurable lesion; lesion is adjacent to rectum                                | 81 (3)                                 |
| R990           | Soft tissue after RPE    | No treatment                                                | No reliably measurable lesion; lesion is adjacent to rectum                                | 195 (7)                                |
|                | <b>Pelvic lymph node</b> |                                                             |                                                                                            |                                        |
| R156           | Pelvic lymph node        | Systemic treatment (ADT)                                    | No reliably measurable lesion; lesion is adjacent to iliac vein with similar density in CT | 236 (8)                                |
|                | <b>Bone</b>              |                                                             |                                                                                            |                                        |
| R344           | Bone                     | EBRT (left 3 <sup>rd</sup> rib, and pelvic region) with ADT | PSMA-positive lesion <b>without</b> corresponding sclerosis in baseline and follow up CT   | 364 (12)                               |
| R158           | Bone                     | Systemic treatment (ADT)                                    | PSMA-positive lesion <b>without</b> corresponding sclerosis in baseline and follow up CT   | 329 (11)                               |
| R464           | Bone                     | Systemic treatment (ADT)                                    | PSMA-positive lesion <b>without</b> corresponding sclerosis in baseline and follow up CT   | 81 (3)                                 |
| R582           | Bone                     | Systemic treatment (ADT)                                    | PSMA-positive lesion <b>without</b> corresponding sclerosis in baseline and follow up CT   | 238 (8)                                |
| R969           | Bone                     | No treatment                                                | PSMA-positive lesion <b>without</b> corresponding sclerosis in baseline and follow up CT   | 152 (5)                                |
